# Supplementary material
Source: PubMed Central journal article supplement (PMC8891063)
Supplement: NIHMS1767476-supplement-3.pdf [file NIHMS1767476-supplement-3.pdf]

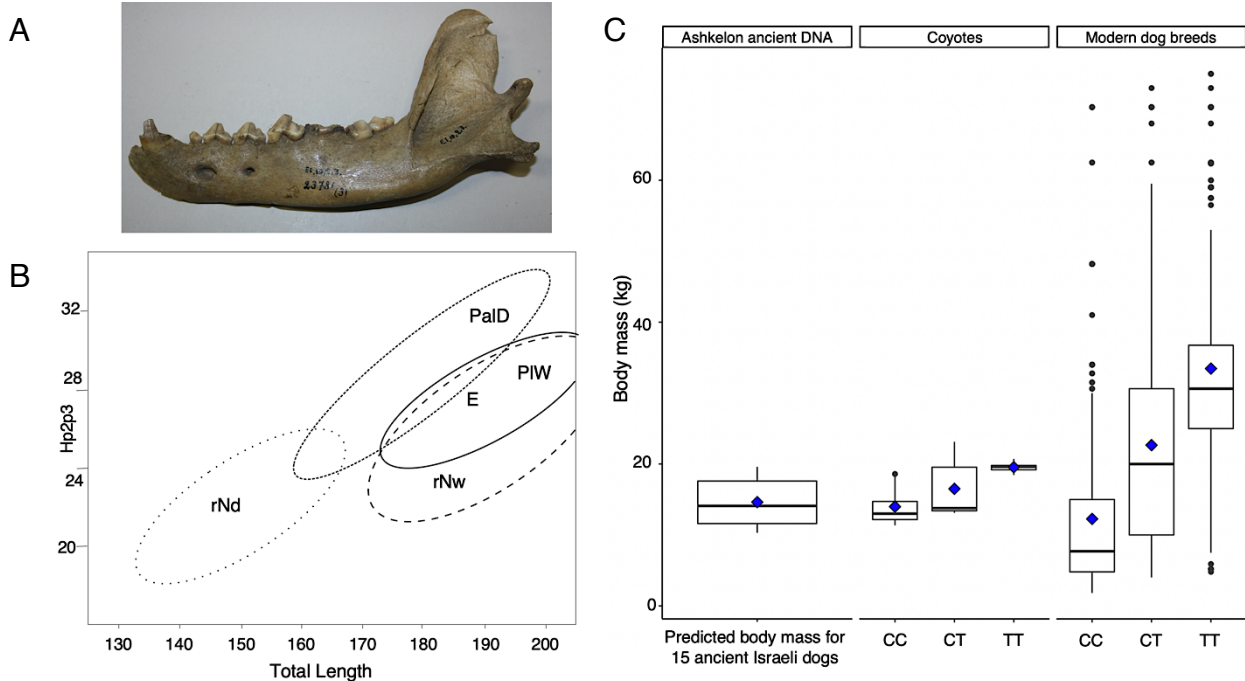

| Specimens                | Age (Ka) | Region         | Site          | Genotype | Element  | Description       | Dimension | Length (Mm) | Losey et al. 2014               | BMe (kg) | Reference                            |
|--------------------------|----------|----------------|---------------|----------|----------|-------------------|-----------|-------------|---------------------------------|----------|--------------------------------------|
| Tirekhtyakh (CGG32)      | 52.5     | Siberia        | natural       | CT       | skull    | Pleistocene wolf  | TL (1)    | 253.5       | $2.70 \cdot \log TL - 4.919$    | 38.1     | Germonpré et al. (2017: table 4)     |
| Eliseevichi (AL2657)     | 16.5     | Western Russia | Epigravettian | TT       | mandible | Pleistocene wolf  | LPcC (4)  | 163.6       | $2.945 \cdot \log LPcC - 5.104$ | 39.6     |                                      |
| Ulakhan Sular (CGG33)    | 16.9     | Siberia        | natural       | CT       | skull    | Palaeolithic wolf | TL (1)    | 206.1       | $2.70 \cdot \log TL - 4.919$    | 21.8     | Germonpré et al. (2017: table 4)     |
| Zhokhov (CGG6, ZH-03-97) | 9.5      | Siberia        | prehistoric   | CT       | mandible | ancient dog       |           |             |                                 | 24.8     | Pitulko and Kasparov (2017: table 9) |

**Figure S1. Body mass prediction using ancient canid fossils and *IGF1-AS* variant. Related to Figure 2 and STAR Methods.** (A) Lateral view of mandible Eliseevichi AL2657. (B) Bivariate plot of Hp2p3 (mm) showing total length of mandible (mm). See table for specifics. Eliseevichi jaw only is shown in plot. Hp2p3: height of the mandible between p2 and p3. E: Eliseevichi AL2657; wolves from rNw: recent northern (n=39), PIW: Pleistocene (n=18). Dogs from rNd: recent northern (n=39), PalD: Palaeolithic (n=18). LPcC: Length from condyle process to border of the canine alveolus; TL: Total length of the skull as measured by <sup>20</sup>. (C) Body mass comparison between ancient dogs, modern dogs and coyotes. Diamonds = mean body mass; black horizontal bars = medians.

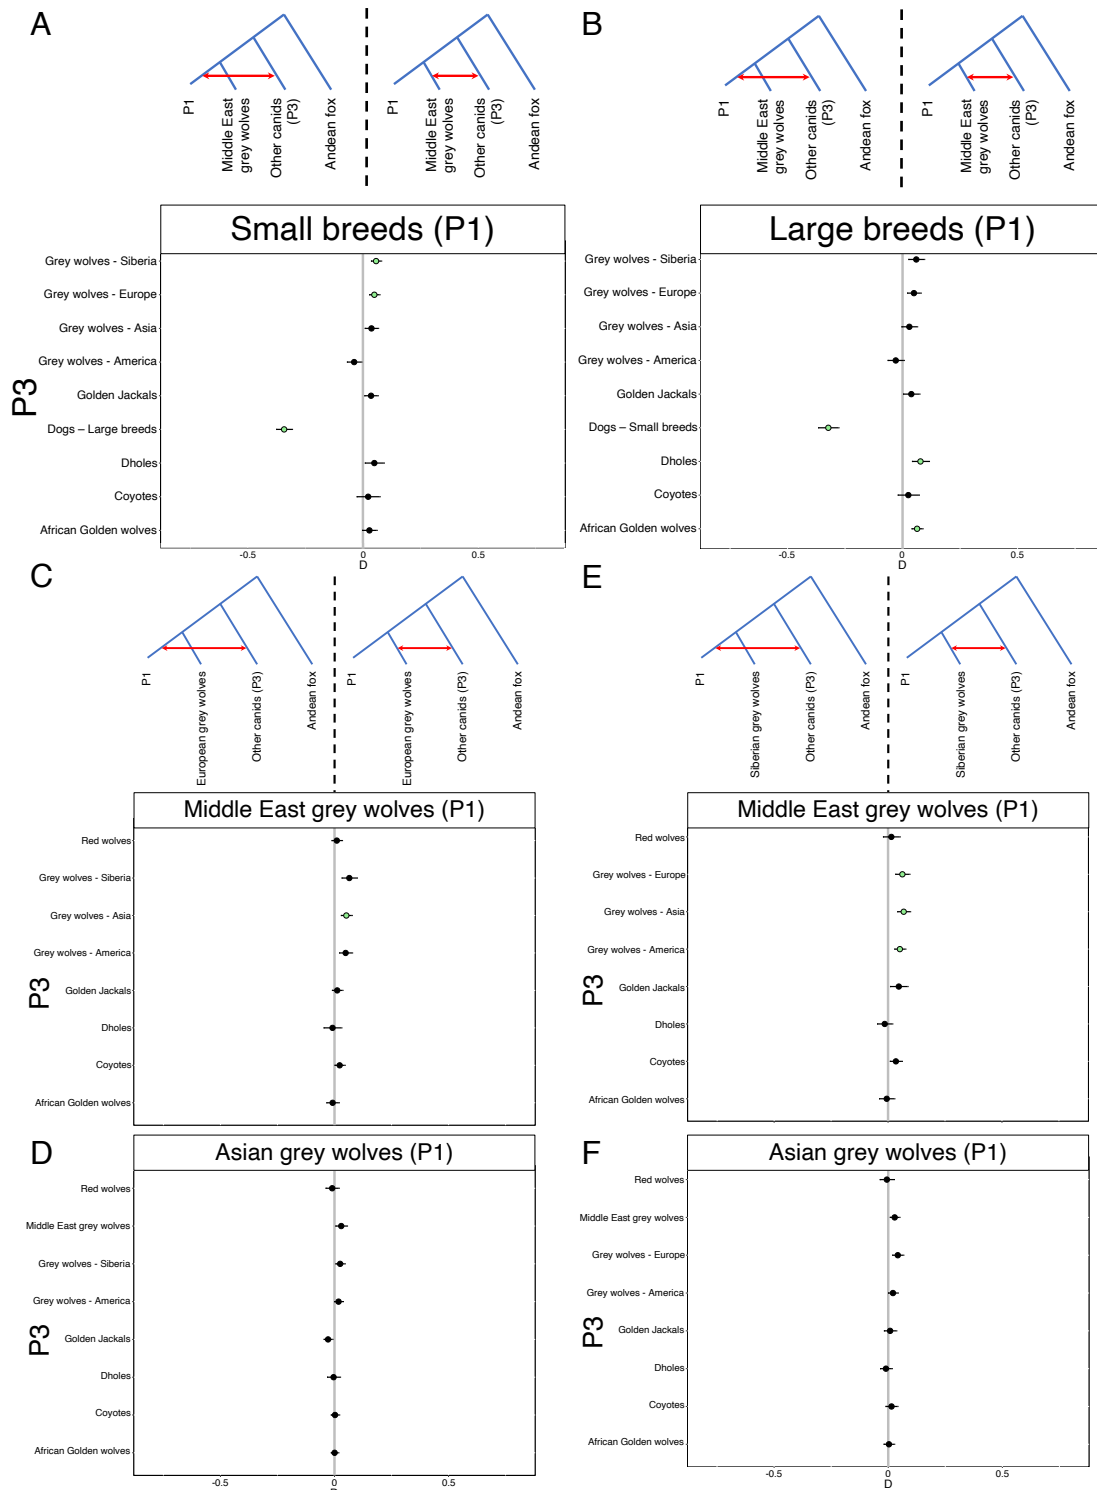

**Figure S2. D-Statistics to test the hypothesis of gene flow existing (A-B) between dogs and other wild canids, and (C-F) between small grey wolves and other wild canids. Related to Figures 2, 3 and STAR Methods. (A-B) Small and large breeds are defined in STAR Methods. Results for analyses zoomed in on 2Mb locus centered on *IGF1-AS* variant. P1 population is indicated at the top of each graph. Significant values (P value<0.05) are highlighted in green. Error bars represent the standard error estimated via jackknife resampling with a block size of one MB.**

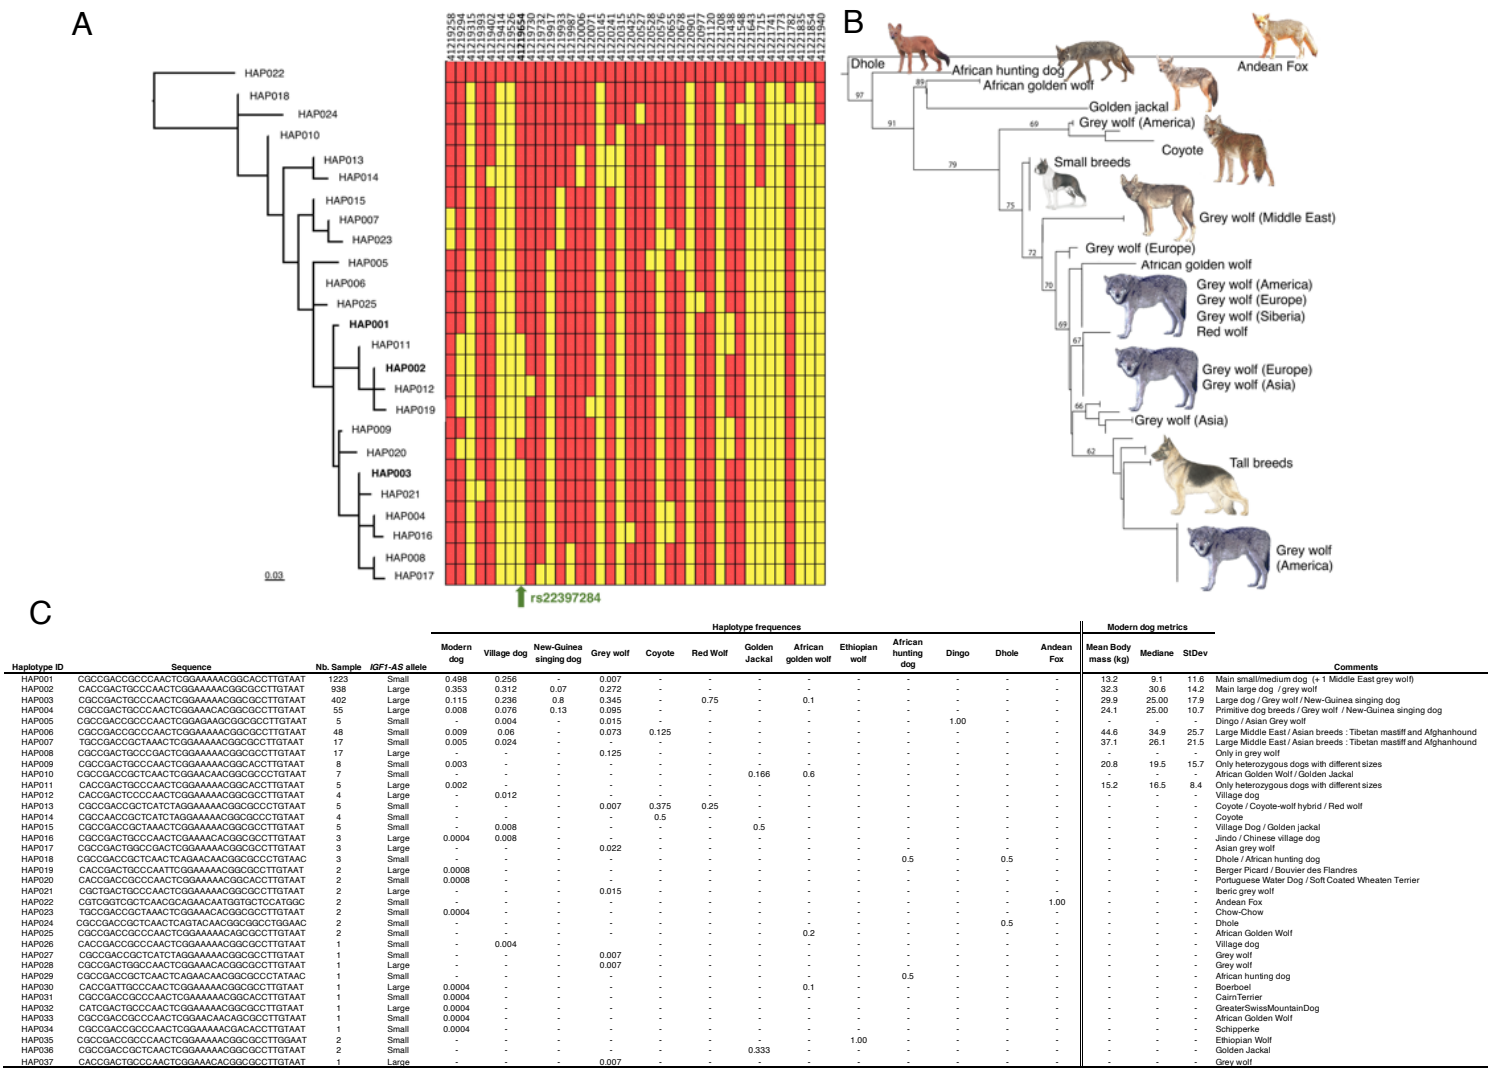

**Figure S3. Haplotype analysis and IGF1-AS neighbor-joining tree. Related to Figures 2, 3 and STAR Methods (A) Haplotypes spanning IGF1-AS using 38 markers (see supplementary data) and WGS. IGF1-AS variant represented by green arrow. Ancestral alleles (red) defined from the Andean fox; yellow = derived alleles. (B) IGF1-AS neighbor-joining tree based on 2,682 bp of phased sequences rooted using the Andean Fox. Grey wolves are named using their geographic location; breed size assignments are defined in STAR Methods. (C) Haplotype frequencies among the 1,389 canid genomes analysed in this study.**

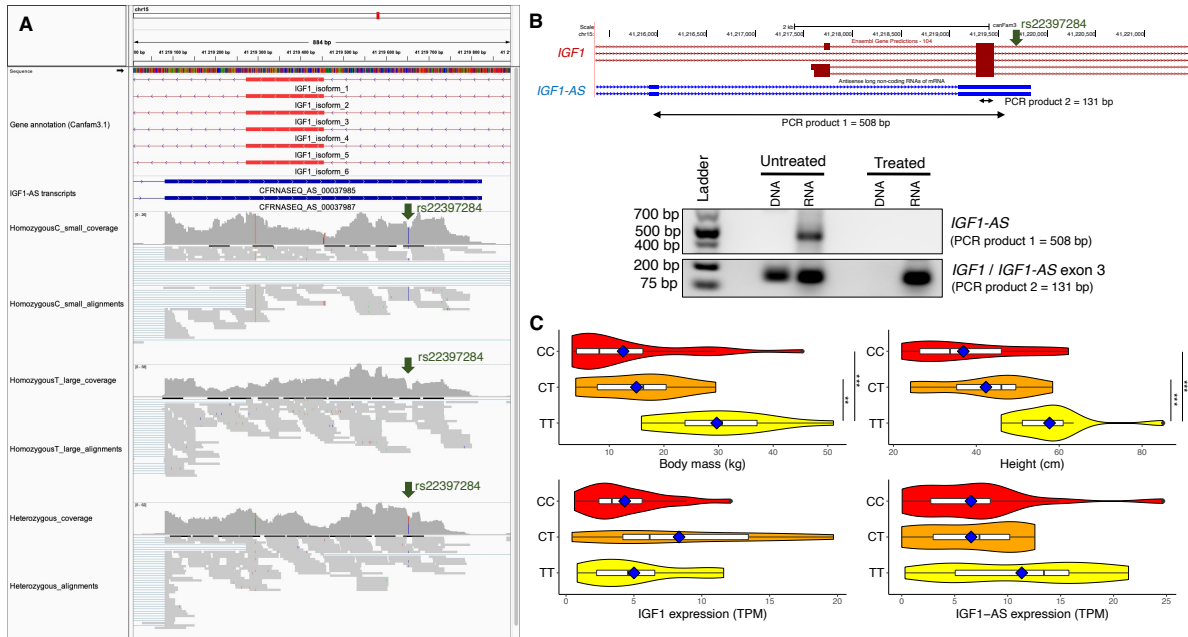

**Figure S4. Functional analyses of *IGF1-AS*. Related to STAR Methods.** A) Screenshot of RNA-SEQ data visualized IGV<sup>70</sup> with a zoom on the last exon of *IGF1-AS*. Red bar = *IGF1* third exon, blue bars = the last exon of *IGF1-AS* (two isoforms), green arrow = the SNP (rs22397284; chr15:41219654.g.T>C) and grey bars = read alignments. The first two RNA-Seq tracks show the homozygous C (small dog-ID:25363) in blue, lines 3-4 RNA-Seq indicate data for a homozygous T (large dog, ID:25460), and the last two tracks highlight data for a heterozygous dog. (B) Results of the RPA using DNase/RNase treatment. Top panel: Control indicating efficiency of the nuclease treatment on *IGF1-AS* detection. Bottom panel: Presence of *IGF1-AS*/*IGF1* mRNA duplex (exon 3) validated by RT-PCR in cDNA produced from nuclease treated RNA (C) RNA-seq analyses of testes from 26 small and 14 large dog breeds (STAR Methods). Upper boxplots: body mass and height distributions for the three genotypes. Diamonds = mean body mass; black vertical bars = medians. (\*\*P < 0.001, \*\*\*P < 0.0001, Mann-Whitney-Wilcoxon tests). Bottom boxplots: *IGF1* and *IGF1-AS* expression levels.

| GWAS Rank | Biallelic SNV  | dbSNP number | Large allele (Dog reference) | Small allele | GWAS data                   |          |                   |                                          |                                 | All WGS data                    |                                 |                                |                                |                                |                    |                        | Sanger sequenced wild canids |                |                   |                                               |                                 | Sanger sequenced specific breeds |                           |                  |                        |                          |                         |                      |                 |                       |                      |     |
|-----------|----------------|--------------|------------------------------|--------------|-----------------------------|----------|-------------------|------------------------------------------|---------------------------------|---------------------------------|---------------------------------|--------------------------------|--------------------------------|--------------------------------|--------------------|------------------------|------------------------------|----------------|-------------------|-----------------------------------------------|---------------------------------|----------------------------------|---------------------------|------------------|------------------------|--------------------------|-------------------------|----------------------|-----------------|-----------------------|----------------------|-----|
|           |                |              |                              |              | All breeds population n=456 |          | p <sub>Wald</sub> | p <sub>Wald after correction</sub> n=446 | Small breeds (SBW <15 kg) n=162 | Medium breeds (15<SBW<25) n=106 | Large breeds (SBW >25 kg) n=188 | Small breed (SBW <15 kg) n=438 | Medium breed (15<SBW<25) n=191 | Large breed (SBW >25 kg) n=426 | Village dogs n=125 | Grey wolves n=28       | Coyote n=4                   | Red wolves n=2 | Other canids n=18 | Only wild canids body size GWAS p-values n=80 | Grey wolves America/Europe n=29 | Grey wolves MiddleEast/Asia n=17 | Coyotes West-MidWest n=31 | Coyotes East n=4 | Other canids n=12      | Miniature Schnauzer n=48 | Standard Schnauzer n=42 | Giant Schnauzer n=46 | Toy Poodle n=48 | Miniature Poodle n=48 | Standard Poodle n=48 |     |
|           |                |              |                              |              | AI                          | Beta     |                   |                                          | Variance                        | Small allele frequency          |                                 |                                | Small allele frequency         |                                |                    | Small allele frequency |                              |                |                   | Small allele frequency                        |                                 |                                  |                           |                  | Small allele frequency |                          |                         |                      |                 |                       |                      |     |
|           |                |              |                              |              | 1e-31                       | 1.36e-30 | 0.82              | 0.42                                     | 0.19                            | 0.8                             | 0.43                            | 0.21                           | 0.19                           | 0                              | 0                  | 0                      | 0                            | 1              | 1.68e-19          | 0.18                                          | 0.5                             | 0.94                             | 0.5                       | 1                | 0.96                   | 0.9                      | 0                       | 1                    | 0.97            | 0.5                   |                      |     |
| 1         | chr15:41216368 | NA           | C                            | T            | 0.51                        | -7.25    | 0.11              | 1.36e-30                                 | 0.82                            | 0.42                            | 0.19                            | 0.8                            | 0.43                           | 0.21                           | 0.19               | 0                      | 0                            | 0              | 0                 | 1                                             | -                               | -                                | -                         | -                | -                      | -                        | -                       | -                    | -               | -                     |                      |     |
| 2         | chr15:41221438 | rs22437444   | G                            | A            | 0.52                        | -7.17    | 0.11              | 2.48e-31                                 | 0.83                            | 0.41                            | 0.19                            | 0.8                            | 0.42                           | 0.21                           | 0.18               | 0.01                   | 0                            | 0              | 0                 | 0                                             | 0.32                            | 0                                | 0                         | 0                | 0                      | 0                        | -                       | -                    | -               | -                     | -                    |     |
| 3         | chr15:41216597 | rs22362978   | G                            | A            | 0.51                        | 7.06     | 0.11              | 3.36e-30                                 | 0.82                            | 0.44                            | 0.19                            | 0.79                           | 0.45                           | 0.22                           | 0.23               | 0.09                   | 0                            | 0.25           | 0.06              | 0.82                                          | -                               | -                                | -                         | -                | -                      | -                        | -                       | -                    | -               | -                     |                      |     |
| 4         | chr15:41219654 | rs22397284   | T                            | C            | 0.5                         | 6.84     | 0.1               | 3.97e-29                                 | 0.83                            | 0.42                            | 0.21                            | 0.8                            | 0.44                           | 0.23                           | 0.28               | 0.12                   | 1                            | 0.25           | 0.97              | 1.68e-19                                      | 0.37                            | -                                | -                         | -                | -                      | -                        | -                       | -                    | -               | -                     |                      |     |
| 5         | chr15:41227725 | NA           | G                            | A            | 0.55                        | -6.92    | 0.1               | 4.56e-29                                 | 0.78                            | 0.39                            | 0.16                            | 0.76                           | 0.4                            | 0.19                           | 0.2                | 0.07                   | 0                            | 0              | 0.11              | 0.37                                          | -                               | -                                | -                         | -                | -                      | -                        | -                       | -                    | -               | -                     |                      |     |
| 6         | chr15:41228068 | NA           | G                            | A            | 0.55                        | -6.92    | 0.1               | 4.56e-29                                 | 0.78                            | 0.39                            | 0.16                            | 0.76                           | 0.4                            | 0.19                           | 0.2                | 0.05                   | 0                            | 0              | 0.08              | 0.03                                          | -                               | -                                | -                         | -                | -                      | -                        | -                       | -                    | -               | -                     |                      |     |
| 7         | chr15:41217964 | rs22381307   | C                            | A            | 0.5                         | 6.82     | 0.1               | 3.99e-28                                 | 0.83                            | 0.45                            | 0.19                            | 0.8                            | 0.46                           | 0.23                           | 0.25               | 0                      | 0                            | -              | 0.19              | 0.01                                          | -                               | -                                | -                         | -                | -                      | -                        | -                       | -                    | -               | -                     |                      |     |
| 8         | chr15:41229597 | rs22426115   | A                            | G            | 0.54                        | -6.78    | 0.1               | 5.28e-28                                 | 0.78                            | 0.43                            | 0.15                            | 0.76                           | 0.43                           | 0.18                           | 0.27               | 0.01                   | 0                            | 0              | 0                 | 0.32                                          | -                               | -                                | -                         | -                | -                      | -                        | -                       | -                    | -               | -                     |                      |     |
| 9         | chr15:41217985 | rs22381305   | T                            | C            | 0.49                        | 6.74     | 0.1               | 6.57e-28                                 | 0.83                            | 0.46                            | 0.21                            | 0.8                            | 0.45                           | 0.24                           | 0.28               | 0.14                   | 1                            | -              | 0.97              | 2.82e-14                                      | -                               | -                                | -                         | -                | -                      | -                        | -                       | -                    | -               | -                     |                      |     |
| 10        | chr15:41229800 | rs22426118   | T                            | C            | 0.55                        | -6.67    | 0.1               | 1.74e-27                                 | 0.78                            | 0.42                            | 0.15                            | 0.76                           | 0.42                           | 0.18                           | 0.27               | 0.01                   | 0                            | 0              | 0                 | 0.32                                          | -                               | -                                | -                         | -                | -                      | -                        | -                       | -                    | -               | -                     |                      |     |
| -         | chr15:41220980 | -            | SINE                         | -            | -                           | -        | NA                | NA                                       | -                               | -                               | -                               | -                              | -                              | -                              | -                  | 0                      | 0                            | 0              | 0                 | 0                                             | 0                               | 0                                | 0                         | 0                | 0                      | 0                        | 0.96                    | 0.85                 | 0               | 1                     | 0.9                  | 0.4 |

Table S1. Top 10 most associated variants with body size variations in dogs and wild canids. Related to Figures 1, 2 and 4.

The genetic variance attributable to each variant was estimated as  $V=2^*A^*(1-A)^*(beta^2)/(variance(breed\ body\ mass\ average)-231.6)$ . Beta is the estimated SNP effect (regression coefficient) given by GEMMA (Zhou et al. Nat. Genet 2012). For the SINE (207bp), we used IGV software to detect the presence of the SINE in WGS, and for Sanger sequenced samples, we only ran PCR product on an 2% agarose gel to detect presence/absence. \* We removed three non-European breeds (four Chowchow, two Afghanhound, two Tibetan mastiff) that do not appear under selection for body size on this locus (these breeds carry their own haplotypes); AI: Small allele frequency ; - : Not checked ; NA: Not applicable ; Dog reference : Canfam3.1.



| Individual ID | Species | Age   | Location                                         | Reference                                     | Coverage | Lat    | Long    | IGF1-AS<br>variant | BME<br>(kg) | Name on the map (Fig. 2A)  | Additional information for the three new samples |                    |           |            |                 |              |                            |              |            |
|---------------|---------|-------|--------------------------------------------------|-----------------------------------------------|----------|--------|---------|--------------------|-------------|----------------------------|--------------------------------------------------|--------------------|-----------|------------|-----------------|--------------|----------------------------|--------------|------------|
|               |         |       |                                                  |                                               |          |        |         |                    |             |                            | Dating Lab                                       | NRCF<br>Grant Code | OXA_ID    | Extract_No | Uncal RC<br>Age | Error<br>+/- | From Cal BP<br>(Int Cal13) | To Cal<br>BP | Percentage |
| C32           | Dog     | 100   | Bulgunnyakhtakh lake, Russia                     | Bergstrom et al, <i>Science</i> 2020          | 7.20     | 61.2   | 128.4   | CT                 | -           | Bulgunnyakhtakh L. 0.1k    |                                                  |                    |           |            |                 |              |                            |              |            |
| F3781         | Dog     | 100   | East Siberian Sea coast, Russia                  | Bergstrom et al, <i>Science</i> 2020          | 0.80     | 69.6   | 164.3   | TT                 | -           | East Siberian Sea 0.1k     |                                                  |                    |           |            |                 |              |                            |              |            |
| UZA001        | Dog     | 875   | Uza, Israel                                      | Bergstrom et al, <i>Science</i> 2020          | 5.80     | 31.6   | 34.8    | CC                 | -           | Uza 0.8-1.6k (x2)          |                                                  |                    |           |            |                 |              |                            |              |            |
| AL3223        | Dog     | 1000  | Weyanoke Old Town, Virginia, USA                 | Leathlobhair et al, <i>Science</i> 2018       | 0.40     | NA     | NA      | -                  | -           | -                          |                                                  |                    |           |            |                 |              |                            |              |            |
| AL2022        | Dog     | 1565  | Marmara region, Turkey                           | Bergstrom et al, <i>Science</i> 2020          | 2.50     | 41.0   | 28.9    | CT                 | -           | Turkey 1.5k                |                                                  |                    |           |            |                 |              |                            |              |            |
| UZA002        | Dog     | 1600  | Uza, Israel                                      | Bergstrom et al, <i>Science</i> 2020          | 5.50     | 31.6   | 34.8    | TT                 | -           | Uza 0.8-1.6k (x2)          |                                                  |                    |           |            |                 |              |                            |              |            |
| ASHQ01        | Dog     | 2300  | Ashkelon, Israel                                 | Bergstrom et al, <i>Science</i> 2020          | 2.40     | 31.7   | 34.6    | CC                 | ~14.6       | Ashkelon 2.3k (x2)         |                                                  |                    |           |            |                 |              |                            |              |            |
| ASHQ06        | Dog     | 2300  | Ashkelon, Israel                                 | Bergstrom et al, <i>Science</i> 2020          | 1.80     | 31.7   | 34.6    | CC                 | ~14.6       | Ashkelon 2.3k (x3)         |                                                  |                    |           |            |                 |              |                            |              |            |
| ASHQ08        | Dog     | 2300  | Ashkelon, Israel                                 | Bergstrom et al, <i>Science</i> 2020          | 2.20     | 31.7   | 34.6    | CC                 | ~14.6       | Ashkelon 2.3k (x3)         |                                                  |                    |           |            |                 |              |                            |              |            |
| TGEZ06        | Dog     | 2300  | Tel Gezer, Israel                                | Bergstrom et al, <i>Science</i> 2020          | 0.90     | 31.9   | 34.9    | CC                 | -           | Tel Gezer 2.3k             |                                                  |                    |           |            |                 |              |                            |              |            |
| C62           | Dog     | 3100  | Apalle, Sweden                                   | Bergstrom et al, <i>Science</i> 2020          | 0.70     | 59.7   | 17.6    | CC                 | -           | Sweden 3.1k                |                                                  |                    |           |            |                 |              |                            |              |            |
| C5            | Dog     | 3800  | Krasnosamarskoe, Russia                          | Bergstrom et al, <i>Science</i> 2020          | 0.60     | 52.8   | 51.1    | -                  | -           | -                          |                                                  |                    |           |            |                 |              |                            |              |            |
| AL2397        | Dog     | 4000  | Belverde di Cetona, Italy                        | Bergstrom et al, <i>Science</i> 2020          | 1.50     | 43.0   | 11.9    | TT                 | -           | Italy 4k                   |                                                  |                    |           |            |                 |              |                            |              |            |
| AL3194        | Dog     | 4000  | Port au Choix, Canada                            | Leathlobhair et al, <i>Science</i> 2018       | 1.92     | 50.703 | -57.352 | TT                 | -           | Port au Choix 4k           |                                                  |                    |           |            |                 |              |                            |              |            |
| G94           | Dog     | 4000  | Stora Fövar, Gotland, Sweden                     | Bergstrom et al, <i>Science</i> 2020          | 0.20     | 57.3   | 18.0    | -                  | -           | -                          |                                                  |                    |           |            |                 |              |                            |              |            |
| ALP001        | Dog     | 4500  | Alymas-Podunavljje, Croatia                      | Bergstrom et al, <i>Science</i> 2020          | 1.60     | 45.5   | 19.0    | CC                 | -           | Croatia 4.5-4.9k (x2)      |                                                  |                    |           |            |                 |              |                            |              |            |
| C89           | Dog     | 4800  | Ajvide, Gotland, Sweden                          | Bergstrom et al, <i>Science</i> 2020          | 2.20     | 57.2   | 18.1    | TT                 | -           | Sweden 4.8k (x2)           |                                                  |                    |           |            |                 |              |                            |              |            |
| C90           | Dog     | 4800  | Ajvide, Gotland, Sweden                          | Bergstrom et al, <i>Science</i> 2020          | 0.60     | 57.2   | 18.1    | TT                 | -           | Sweden 4.8k (x2)           |                                                  |                    |           |            |                 |              |                            |              |            |
| CTC           | Dog     | 4800  | Cherry Tree Cave, Germany                        | Botigue et al, <i>Nat. Commun.</i> 2017       | 9.00     | 49.8   | 10.8    | CC                 | -           | Germany 4.8k               |                                                  |                    |           |            |                 |              |                            |              |            |
| NGDG          | Dog     | 4800  | Newgrange, Ireland                               | Frantz et al, <i>Science</i> 2016             | 30       | 53.694 | -6.475  | TT                 | -           | Ireland 4.8k               |                                                  |                    |           |            |                 |              |                            |              |            |
| SOTN01        | Dog     | 4900  | Sotin, Croatia                                   | Bergstrom et al, <i>Science</i> 2020          | 11.20    | 45.3   | 19.1    | CC                 | -           | Croatia 4.5-4.9k (x2)      |                                                  |                    |           |            |                 |              |                            |              |            |
| C88           | Dog     | 5000  | Frälsegården, Gökhem, Sweden                     | Bergstrom et al, <i>Science</i> 2020          | 0.70     | 58.1   | 13.2    | TT                 | -           | Sweden 5k                  |                                                  |                    |           |            |                 |              |                            |              |            |
| AL2350        | Wolf    | 5169  | Botai, Kazakhstan                                | Unpublished                                   | 1.43     | 53.2   | 67.9    | TT                 | -           | Botai 5.1k                 | Oxford RLAHA                                     | NF/2016/2/4        | OxA-36898 | AL2350     | 4492            | 29           | 5296                       | 5041         | 95.4       |
| AL2571        | Dog     | 5826  | Tepe Ghela Gap, Iran                             | Bergstrom et al, <i>Science</i> 2020          | 1.10     | 36.5   | 47.1    | CC                 | -           | Iran 5.8k                  |                                                  |                    |           |            |                 |              |                            |              |            |
| OL4029        | Dog     | 6230  | Marizulo Cave, Gipuzkoa, Spain                   | Bergstrom et al, <i>Science</i> 2020          | 0.10     | 43.3   | -2.1    | -                  | -           | -                          |                                                  |                    |           |            |                 |              |                            |              |            |
| AL3185        | Wolf    | 6307  | Pietrele, Romania                                | Unpublished                                   | 4.21     | 43.9   | 24.9    | CT                 | -           | Pietrele 6.3k              | Oxford RLAHA                                     | NF/2016/2/4        | OxA-36897 | AL3185     | 5657            | 33           | 6505                       | 6390         | 88         |
| OL4222        | Dog     | 6544  | Skoteini cave, Tharrounia, Euboea Island, Greece | Bergstrom et al, <i>Science</i> 2020          | 4.50     | 38.5   | 24.0    | CC                 | -           | Greece 6.5k                |                                                  |                    |           |            |                 |              |                            |              |            |
| AL2946        | Dog     | 6839  | Pločnik, Serbia                                  | Bergstrom et al, <i>Science</i> 2020          | 0.20     | 43.2   | 21.4    | CC                 | -           | Serbia 6.7k                |                                                  |                    |           |            |                 |              |                            |              |            |
| OL4223        | Dog     | 6900  | Pad' Kalashnikova, Russia                        | Bergstrom et al, <i>Science</i> 2020          | 2.20     | 52.7   | 103.7   | -                  | -           | -                          |                                                  |                    |           |            |                 |              |                            |              |            |
| C26           | Dog     | 7000  | Pad' Kalashnikova, Russia                        | Bergstrom et al, <i>Science</i> 2020          | 0.20     | 53.1   | 103.4   | -                  | -           | -                          |                                                  |                    |           |            |                 |              |                            |              |            |
| HXH           | Dog     | 7000  | Herxheim, Germany                                | Botigue et al, <i>Nat. Commun.</i> 2017       | 9.00     | 49.1   | 8.1     | CT                 | -           | Germany 7k                 |                                                  |                    |           |            |                 |              |                            |              |            |
| THRZ02        | Dog     | 7000  | Tel Hreiz, Israel                                | Bergstrom et al, <i>Science</i> 2020          | 0.10     | 32.7   | 35.1    | CC                 | -           | Israel 7k                  |                                                  |                    |           |            |                 |              |                            |              |            |
| C27           | Dog     | 7400  | Shamanka II, Russia                              | Bergstrom et al, <i>Science</i> 2020          | 0.30     | 51.7   | 103.7   | -                  | -           | -                          |                                                  |                    |           |            |                 |              |                            |              |            |
| CGG6          | Dog     | 9500  | Zhokhov Island, Russia                           | Sinding et al, <i>Science</i> 2020            | 9.6      | 76.141 | 152.733 | CT                 | 24.8        | Zhokhov Island 9.5k        |                                                  |                    |           |            |                 |              |                            |              |            |
| OL4061        | Dog     | 10930 | Vereye, Lake Lacha, Russia                       | Bergstrom et al, <i>Science</i> 2020          | 1.80     | 61.3   | -8.9    | TT                 | -           | Karelia 10.9k              |                                                  |                    |           |            |                 |              |                            |              |            |
| Tumat2        | Wolf    | 14122 | Tumat, Russia                                    | Ramos-Madrigal et al, <i>Curr. Biol.</i> 2020 | 5.162    | 70.72  | 139.23  | TT                 | -           | Tumat 14.1k                |                                                  |                    |           |            |                 |              |                            |              |            |
| CGG33         | Wolf    | 16900 | Ulakhan Sular, Russia                            | Ramos-Madrigal et al, <i>Curr. Biol.</i> 2020 | 15.279   | 56.71  | 131.85  | CT                 | 21.8        | Ulakhan Sular 16.8k        |                                                  |                    |           |            |                 |              |                            |              |            |
| AL2657        | Wolf    | 16500 | Eliseevichi, W Russia                            | Unpublished                                   | 0.93     | 53.1   | 33.6    | TT                 | 39.6        | Eliseevichi 17.6k          | Oxford RLAHA                                     | NF/2016/2/4        | OxA-35646 | AL2657     | 14445           | 65           | 17860                      | 17405        | 95.4       |
| CGG23         | Wolf    | 33020 | Yana site                                        | Sinding et al, <i>Science</i> 2020            | 4.45     | 70.7   | 135.4   | TT                 | -           | Yana site 33k              |                                                  |                    |           |            |                 |              |                            |              |            |
| Taimyr-1      | Wolf    | 34902 | Taimyr Peninsula, C Siberia                      | Skoglund et al, <i>Curr. Biol.</i> 2015       | 2.42     | 73.3   | 104.3   | TT                 | -           | Taimyr Peninsula 35k       |                                                  |                    |           |            |                 |              |                            |              |            |
| CGG29         | Wolf    | 48210 | Bunge-Toll-1885 site, Yana river                 | Ramos-Madrigal et al, <i>Curr. Biol.</i> 2020 | 6.29     | 68.9   | 134.5   | TT                 | -           | Bunge-Toll-1885 site 48.2k |                                                  |                    |           |            |                 |              |                            |              |            |
| CGG32         | Wolf    | 52500 | Tirekhtyakh                                      | Ramos-Madrigal et al, <i>Curr. Biol.</i> 2020 | 15.10    | 68.9   | 147.2   | CT                 | 38.1        | Tirekhtyakh 52.5k          |                                                  |                    |           |            |                 |              |                            |              |            |

Table S3. Ancient genomes dataset and their IGF1-AS genotype. Related to Figure 2.
